# Supplementary material for: D 4h H©K4H4−: a planar tetracoordinate hydrogen global minimum
Source: Royal Society of Chemistry journal article supplement (doi:10.1039/d4cc01368a), 2024-01-01
Supplement: d4cc01368a1.pdf [file d4cc01368a1.pdf]

## SUPPORTING INFORMATION

### $D_{4h}$ H@K<sub>4</sub>H<sub>4</sub><sup>-</sup> : A Planar Tetracoordinate Hydrogen Global Minimum

Li-Xia Bai, Yan-Xia Jin, and Jin-Chang Guo\*

*Key Laboratory of Materials for Energy Conversion and Storage of Shanxi Province,*

*Institute of Molecular Science, Shanxi University, Taiyuan 030006, China*

\*E-mail: guojc@sxu.edu.cn

### Supporting Information

- Table S1.** The lowest vibrational frequency (in cm<sup>-1</sup>) at eight theoretical levels for the global-minimum structure **1** ( $D_{4h}$ , <sup>1</sup>A<sub>1g</sub>) of H@K<sub>4</sub>H<sub>4</sub><sup>-</sup> cluster.
- Table S2.** Energy components of IQA for **1** at the PBE0/TZ2P level; Vint IQA, Vint C, and Vint XC are the interatomic IQA interaction energy, the coulombic and exchange-correlation energy components, respectively, in kcal mol<sup>-1</sup>.
- Table S3.** Composition analysis of canonical molecular orbitals (CMOs) for the GM (**1**) structure of H@K<sub>4</sub>H<sub>4</sub><sup>-</sup> at the PBE0/def2-TZVPP level.
- Figure S1.** Optimized structures of  $D_{4h}$  H@M<sub>4</sub>H<sub>4</sub><sup>-</sup> (M = Li, Na, Rb, Cs) at the PBE0-D3(BJ)/def2-TZVPP level. The lowest frequencies (in cm<sup>-1</sup>) and the numbers of imaginary frequencies (NIMG) are shown.
- Figure S2.** Optimized structures of H@K<sub>4</sub>H<sub>4</sub><sup>-</sup> at the CCSD/def2-TZVPP (a) and CCSD(T)/def2-TZVPP (b) levels. The bond distances (in Å) and the lowest frequencies (in cm<sup>-1</sup>) are shown.
- Figure S3.** Optimized structures for the top 20 low-lying isomers of K<sub>4</sub>H<sub>5</sub><sup>-</sup> at the PBE0-

D3(BJ)/def2-TZVPP level. Relative energies are listed in kcal/mol at the single-point CCSD(T)/def2-TZVPP//PBE0-D3(BJ)/def2-TZVPP levels, with zero-point energy (ZPE) corrections at PBE0-D3(BJ)/def2-TZVPP. The T1 diagnostic values are listed.

**Figure S4.** Optimized structure of the most stable triplet structure of  $K_4H_5^-$  with dissociation at PBE0-D3(BJ)/def2-TZVPP level. The most stable triplet structure without dissociation is also depicted. Relative energies are listed in kcal mol<sup>-1</sup> at the single-point CCSD(T)/def2-TZVPP//PBE0-D3(BJ)/def2-TZVPP levels, with zero-point energy (ZPE) corrections at PBE0-D3(BJ)/def2-TZVPP. The T1 diagnostic values are listed.

**Figure S5.** Optimized structure of  $K_4H_4$  at the PBE0-D3(BJ)/def2-TZVPP level. The bond distances (in Å), Wiberg bond orders (blue color), and NPA charges (in |e|, red color) are shown.

**Figure S6.** (a) The ELF contour map of **1**. (b) The plot of the Laplacian of electron density, bond paths and critical points. The red dashed lines denote the areas of charge concentration ( $\nabla^2\rho(r) < 0$ ) and the blue area is vice versa. The brown sticks between the atoms represent bond paths. The brown and yellow dots are bond and ring critical points, respectively.

**Figure S7.** Color-filled maps of NICS(0)<sub>zz</sub> for the **1** cluster. Negative values indicate aromaticity. 0 in parentheses represent the height above the molecular plane (in Å). The blue ring indicates the interface with the NICS<sub>zz</sub> values of 0.

**Figure S8.** The canonical molecular orbital energy diagram of **1**.

Cartesian coordinates of the top 20 low-lying isomers of  $K_4H_5^-$  at the PBE0-D3(BJ)/def2-TZVPP level.

**Table S1.** The lowest vibrational frequency (in  $\text{cm}^{-1}$ ) at eight theoretical levels for the global-minimum structure **1** ( $D_{4h}$ ,  ${}^1A_{1g}$ ) of  $\text{H}\odot\text{K}_4\text{H}_4^-$  cluster.

| Theoretical level        | Lowest vibrational frequency ( $\text{cm}^{-1}$ ) |
|--------------------------|---------------------------------------------------|
| PBE0-D3(BJ)/def2-TZVPP   | 29.3                                              |
| BP86-D3(BJ)/def2-TZVPP   | 25.6                                              |
| B3LYP-D3(BJ)/def2-TZVPP  | 27.1                                              |
| B3PW91-D3(BJ)/def2-TZVPP | 26.4                                              |
| TPSS-D3(BJ)/def2-TZVPP   | 26.4                                              |
| MP2/def2-TZVPP           | 27.3                                              |
| M06-2X/def2-TZVPP        | 42.8                                              |
| TPSSh/def2-TZVPP         | 27.5                                              |

**Table S2.** Energy components of IQA for **1** at the PBE0/TZ2P level; Vint IQA, Vint C, and Vint XC are the interatomic IQA interaction energy, the coulombic and exchange-correlation energy components, respectively, in kcal mol<sup>-1</sup>.

|                              | HK <sub>4</sub> H <sub>4</sub> <sup>-</sup> |
|------------------------------|---------------------------------------------|
| Vint IQA (H-K)               | -91.77                                      |
| Vint C (H-K)                 | -78.98 (86.06%)                             |
| Vint XC (H-K)                | -12.79 (13.94%)                             |
| Vint IQA (K-K)               | 55.57                                       |
| Vint C (K-K)                 | 56.51 (98.36%)                              |
| Vint XC (K-K)                | -0.94 (1.64%)                               |
| Vint IQA (H <sup>a</sup> -K) | -98.17                                      |
| Vint C (H <sup>a</sup> -K)   | -80.15 (81.64%)                             |
| Vint XC (H <sup>a</sup> -K)  | -18.02 (18.36%)                             |

<sup>a</sup>H represents the H atoms at the periphery.

**Table S3.** Composition analysis of canonical molecular orbitals (CMOs) for the GM (1) structure of  $\text{H}\text{C}\text{K}_4\text{H}_4^-$  at the PBE0/def2-TZVPP level.

| CMO                                                                                                        | H (%)        | $\text{H}^{\text{a}}$ (%) | $\text{K}_4$ (%) |       |
|------------------------------------------------------------------------------------------------------------|--------------|---------------------------|------------------|-------|
|                                                                                                            | s            | s                         | s/p/d            | total |
| 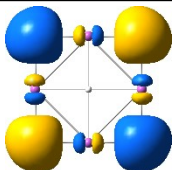<br>HOMO ( $b_{2g}$ )     | 0.00         | <b>88.25</b>              | 0.00/9.54/0.00   | 9.54  |
| <br>HOMO-1 ( $e_u$ )      | 0.00         | <b>84.38</b>              | 7.46/5.30/0.00   | 12.76 |
| <br>HOMO-1' ( $e_u$ )    | 0.00         | <b>84.38</b>              | 7.46/5.30/0.00   | 12.76 |
| <br>HOMO-2 ( $a_{1g}$ ) | <b>25.80</b> | <b>64.38</b>              | 3.38/2.03/3.54   | 8.95  |
| <br>HOMO-3 ( $a_{1g}$ ) | <b>57.38</b> | 18.98                     | 16.00/3.31/0.00  | 19.31 |

<sup>a</sup>H represents the H atoms at the periphery.

**Figure S1.** Optimized structures of  $D_{4h}$   $\text{H}\text{M}_4\text{H}_4^-$  ( $\text{M} = \text{Li}, \text{Na}, \text{Rb}, \text{Cs}$ ) at the PBE0-D3(BJ)/def2-TZVPP level. The lowest frequencies (in  $\text{cm}^{-1}$ ) and the numbers of imaginary frequencies (NIMG) are shown.

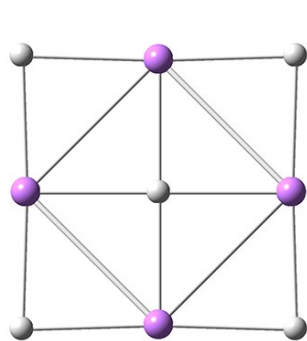

$\text{HLi}_4\text{H}_4^-$  ( $D_{4h}, {}^1\text{A}_{1g}$ )  
287.0i (NIMG 1)

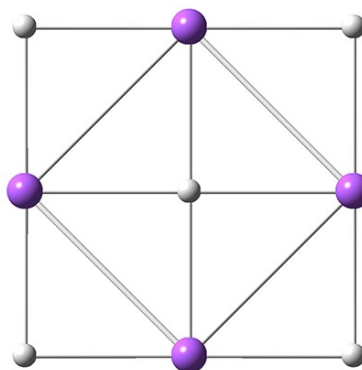

$\text{HNa}_4\text{H}_4^-$  ( $D_{4h}, {}^1\text{A}_{1g}$ )  
191.2i (NIMG 1)

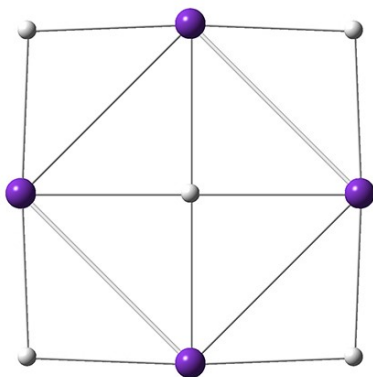

$\text{HRb}_4\text{H}_4^-$  ( $D_{4h}, {}^1\text{A}_{1g}$ )  
92.3i (NIMG 2)

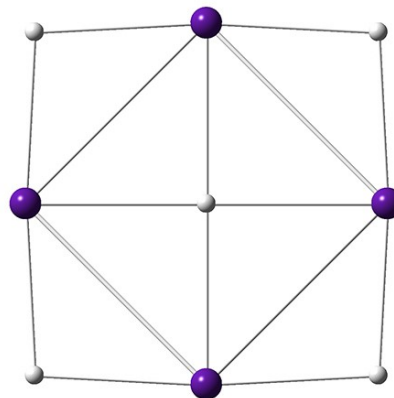

$\text{HCs}_4\text{H}_4^-$  ( $D_{4h}, {}^1\text{A}_{1g}$ )  
161.9i (NIMG 5)

**Figure S2.** Optimized structures of  $\text{H}\text{C}\text{K}_4\text{H}_4^-$  at the CCSD/def2-TZVPP (a) and CCSD(T)/def2-TZVPP (b) levels. The bond distances (in Å) and the lowest frequencies (in  $\text{cm}^{-1}$ ) are shown.

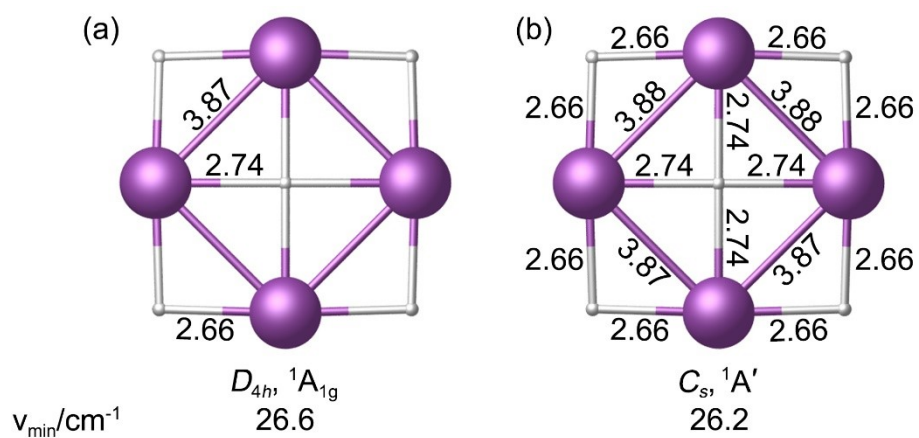

**Figure S3.** Optimized structures for the top 20 low-lying isomers of  $K_4H_5^-$  at the PBE0-D3(BJ)/def2-TZVPP level. Relative energies are listed in kcal/mol at the single-point CCSD(T)/def2-TZVPP//PBE0-D3(BJ)/def2-TZVPP levels, with zero-point energy (ZPE) corrections at PBE0-D3(BJ)/def2-TZVPP. The T1 diagnostic values are listed.

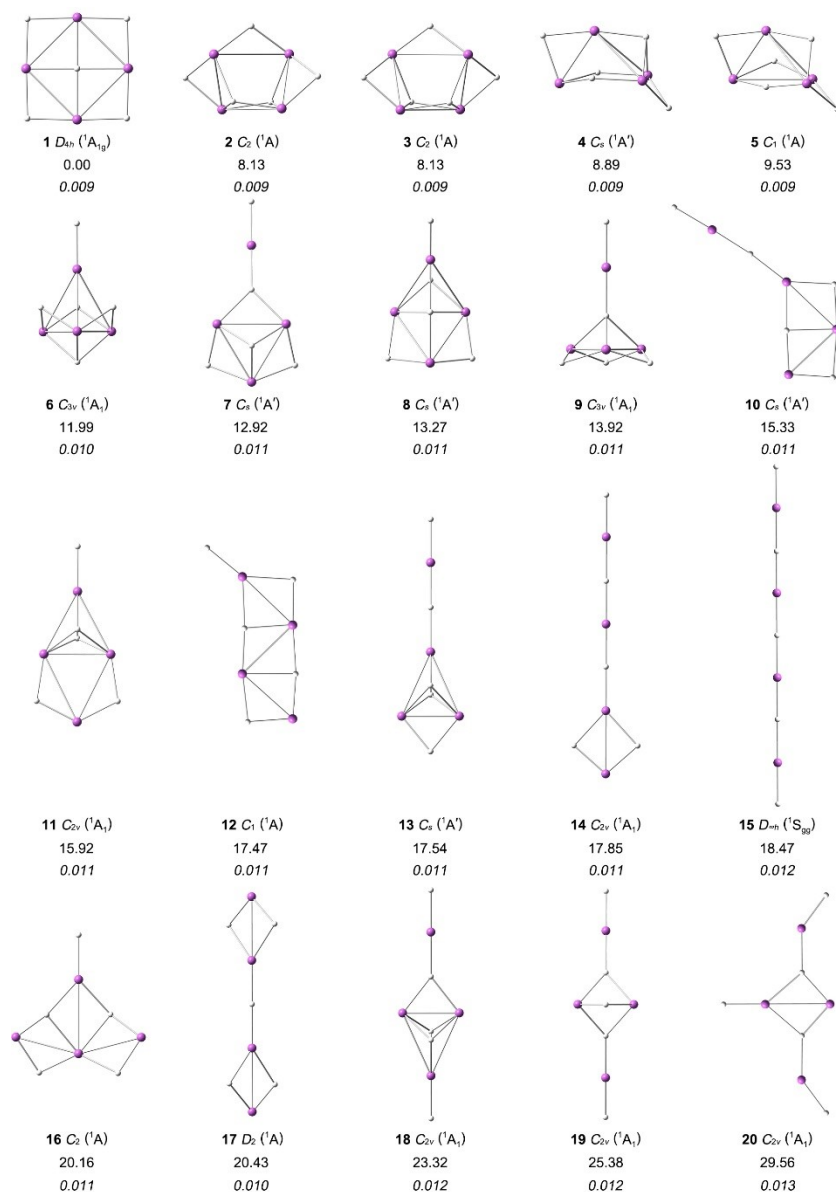



**Figure S4.** Optimized structure of the most stable triplet structure of  $K_4H_5^-$  with dissociation at PBE0-D3(BJ)/def2-TZVPP level. The most stable triplet structure without dissociation is also depicted. Relative energies are listed in kcal mol<sup>-1</sup> at the single-point CCSD(T)/def2-TZVPP//PBE0-D3(BJ)/def2-TZVPP levels, with zero-point energy (ZPE) corrections at PBE0-D3(BJ)/def2-TZVPP. The T1 diagnostic values are listed.

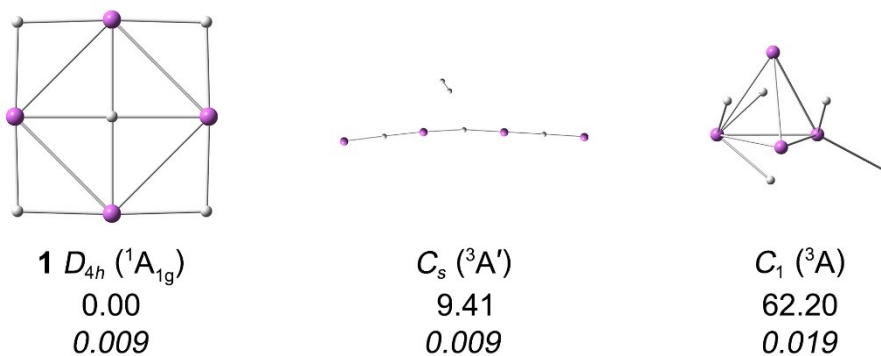

**Figure S5.** Optimized structure of  $K_4H_4$  at the PBE0-D3(BJ)/def2-TZVPP level. The bond distances (in Å), Wiberg bond orders (blue color), and NPA charges (in |e|, red color) are shown.

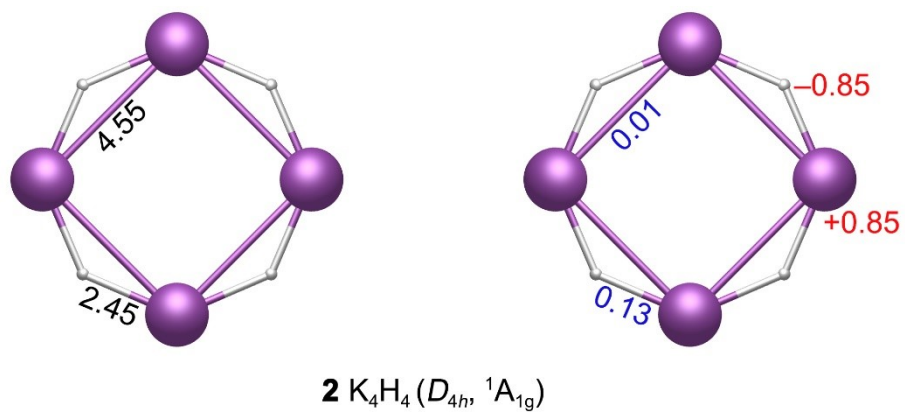

**Figure S6.** (a) The ELF contour map of **1**. (b) The plot of the Laplacian of electron density, bond paths and critical points. The red dashed lines denote the areas of charge concentration ( $\nabla^2\rho(\mathbf{r}) < 0$ ) and the blue area is vice versa. The brown sticks between the atoms represent bond paths. The brown and yellow dots are bond and ring critical points, respectively.

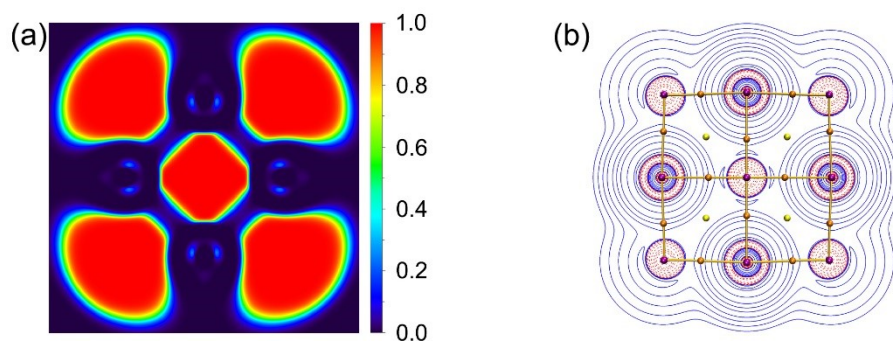

**Figure S7.** Color-filled maps of  $\text{NICS}(0)_{zz}$  for the **1** cluster. Negative values indicate aromaticity. 0 in parentheses represent the height above the molecular plane (in Å). The blue ring indicates the interface with the  $\text{NICS}_{zz}$  values of 0.

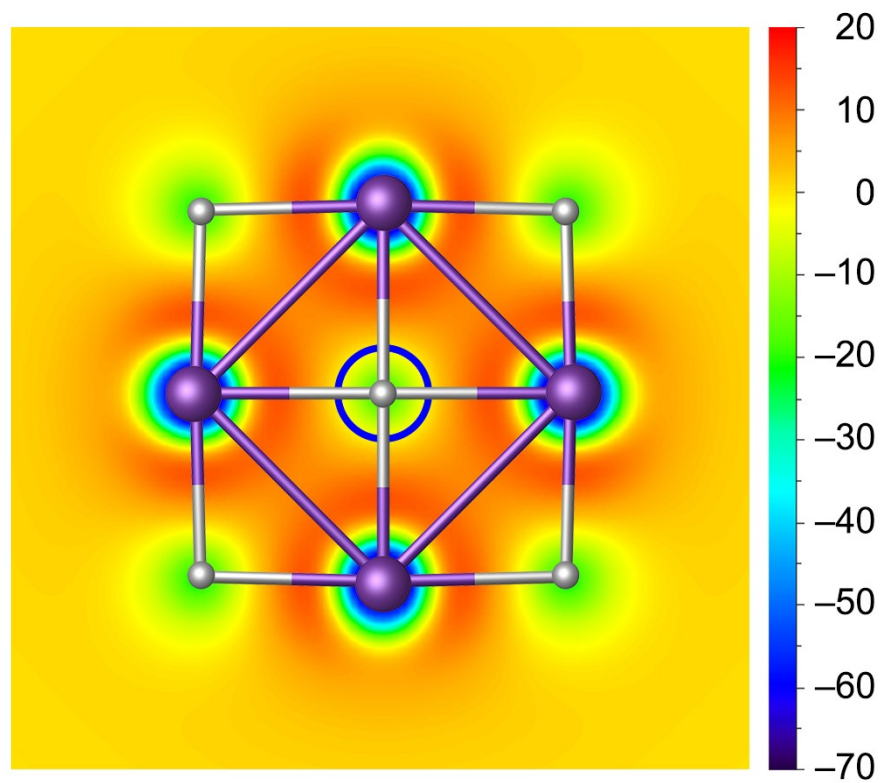

**Figure S8.** The canonical molecular orbital energy diagram of **1**.

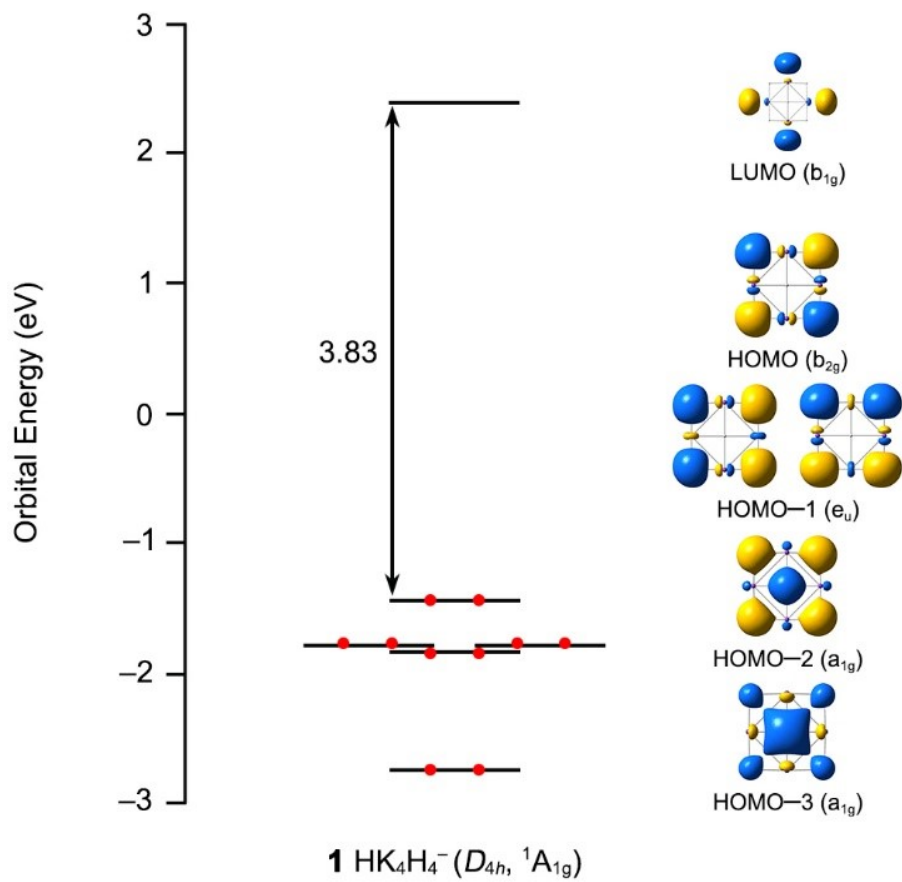

Cartesian coordinates of the top 20 low-lying isomers of  $\text{K}_4\text{H}_5^-$  at the PBE0-D3(BJ)/def2-TZVPP level.

**1**  $\text{H}\odot\text{K}_4\text{H}_4^-$  ( $D_{4h}$ ,  $^1\text{A}_{1g}$ )

|   |             |             |            |
|---|-------------|-------------|------------|
| K | 0.00000000  | 2.65957600  | 0.00000000 |
| K | 2.65957600  | 0.00000000  | 0.00000000 |
| K | 0.00000000  | -2.65957600 | 0.00000000 |
| K | -2.65957600 | 0.00000000  | 0.00000000 |
| H | -2.59300500 | 2.59300500  | 0.00000000 |
| H | 2.59300500  | 2.59300500  | 0.00000000 |
| H | -2.59300500 | -2.59300500 | 0.00000000 |
| H | 2.59300500  | -2.59300500 | 0.00000000 |
| H | 0.00000000  | 0.00000000  | 0.00000000 |

**2** ( $C_2$ ,  $^1\text{A}$ )

|   |             |             |             |
|---|-------------|-------------|-------------|
| K | -0.91133461 | 1.87855438  | 1.41688610  |
| K | 0.91133461  | -1.87855438 | 1.41688610  |
| K | 0.98725991  | 1.66691128  | -1.44838871 |
| K | -0.98725991 | -1.66691128 | -1.44838871 |
| H | -0.71965531 | -3.55190959 | 0.22583368  |
| H | 0.00000000  | 0.00000000  | 2.88318503  |
| H | 1.55061510  | -0.83588022 | -1.06887650 |
| H | -1.55061510 | 0.83588022  | -1.06887650 |
| H | 0.71965531  | 3.55190959  | 0.22583368  |

**3** ( $C_2$ ,  $^1\text{A}$ )

|   |             |             |             |
|---|-------------|-------------|-------------|
| K | -1.09309033 | 1.89512365  | -1.60586294 |
| K | 1.00237929  | 2.15830455  | 1.56807826  |
| K | 1.09309033  | -1.89512365 | -1.60586294 |
| K | -1.00237929 | -2.15830455 | 1.56807826  |
| H | -0.87056421 | 4.18656474  | 0.28960649  |
| H | 0.00000000  | 0.00000000  | 3.36403499  |
| H | -1.86715307 | -1.01684379 | -1.25371501 |
| H | 0.87056421  | -4.18656474 | 0.28960649  |
| H | 1.86715307  | 1.01684379  | -1.25371501 |

**4** ( $C_s$ ,  $^1\text{A}'$ )

|   |             |             |             |
|---|-------------|-------------|-------------|
| K | -1.69942049 | 1.12071329  | 0.00000000  |
| K | 0.23676804  | -1.79179953 | 1.70948474  |
| K | 0.23676804  | -1.79179953 | -1.70948474 |
| K | 1.23918677  | 2.44191741  | 0.00000000  |

|   |             |             |             |
|---|-------------|-------------|-------------|
| H | -1.03021362 | 3.66256140  | 0.00000000  |
| H | 0.53824023  | 0.73677892  | 1.85864304  |
| H | -1.83534948 | -1.50454086 | 0.00000000  |
| H | 0.53824023  | 0.73677892  | -1.85864304 |
| H | 1.53633787  | -3.23317977 | 0.00000000  |

**5** ( $C_1, {}^1A_1$ )

|   |             |             |             |
|---|-------------|-------------|-------------|
| K | 0.79329900  | 1.00089800  | 1.42857700  |
| K | -0.68630200 | -1.83327400 | 0.44228100  |
| K | 2.61456300  | -0.03389500 | -1.13368100 |
| K | -2.73367200 | 0.86380000  | -0.69617000 |
| H | 4.12206900  | 1.81320900  | -0.51307800 |
| H | 1.85598500  | -1.51269100 | 0.91911300  |
| H | -0.00773500 | 0.40625500  | -0.91916500 |
| H | -4.01443500 | -0.76704800 | -1.89467200 |
| H | -1.72576600 | 0.10722500  | 1.62867800  |

**6** ( $C_{3v}, {}^1A_1$ )

|   |             |             |             |
|---|-------------|-------------|-------------|
| K | 2.08001747  | -1.20089865 | 0.95948315  |
| K | -0.00000000 | -0.00000000 | -2.66414712 |
| K | -2.08001747 | -1.20089865 | 0.95948315  |
| K | -0.00000000 | 2.40179729  | 0.95948315  |
| H | -2.29950786 | 1.32762148  | -0.66466321 |
| H | 2.29950786  | 1.32762148  | -0.66466321 |
| H | 0.00000000  | -0.00000000 | -4.99414011 |
| H | 0.00000000  | -2.65524296 | -0.66466321 |
| H | 0.00000000  | -0.00000000 | 2.91638552  |

**7** ( $C_s, {}^1A'$ )

|   |             |             |             |
|---|-------------|-------------|-------------|
| K | 0.49691549  | -3.83576467 | 0.00000000  |
| K | -0.43578474 | -0.46892872 | 2.06222364  |
| K | -0.43578474 | -0.46892872 | -2.06222364 |
| K | 0.32668195  | 4.71304872  | 0.00000000  |
| H | 0.32268817  | 7.04304530  | 0.00000000  |
| H | 0.03078488  | 1.76141139  | 0.00000000  |
| H | -2.06838813 | -2.04625187 | 0.00000000  |
| H | 1.31319183  | -2.80365523 | 2.72049214  |
| H | 1.31319183  | -2.80365523 | -2.72049214 |

**8** ( $C_s, {}^1A'$ )

|   |             |             |             |
|---|-------------|-------------|-------------|
| K | 0.79715011  | 3.16758863  | 0.00000000  |
| K | -0.92599479 | -0.09558743 | -2.12171334 |
| K | -0.92599479 | -0.09558743 | 2.12171334  |
| K | 1.03238279  | -3.04027339 | 0.00000000  |

|   |             |             |             |
|---|-------------|-------------|-------------|
| H | 1.85216826  | 5.24504780  | 0.00000000  |
| H | 1.39274581  | 0.07806706  | 0.00000000  |
| H | -0.37635925 | -2.96473452 | 2.66905463  |
| H | -0.37635925 | -2.96473452 | -2.66905463 |
| H | -2.06551855 | 1.81968691  | 0.00000000  |

**9** ( $C_{3v}, {}^1A_1$ )

|   |             |             |             |
|---|-------------|-------------|-------------|
| K | 0.00000000  | 2.37581750  | -1.28319460 |
| K | -2.05751831 | -1.18790875 | -1.28319460 |
| K | -0.00000000 | 0.00000000  | 3.81170104  |
| K | 2.05751831  | -1.18790875 | -1.28319460 |
| H | 0.00000000  | 0.00000000  | 0.82913690  |
| H | 0.00000000  | 0.00000000  | 6.14169681  |
| H | 2.77173697  | 1.60026309  | -2.08368711 |
| H | -2.77173697 | 1.60026309  | -2.08368711 |
| H | 0.00000000  | -3.20052618 | -2.08368711 |

**10** ( $C_s, {}^1A'$ )

|   |             |             |            |
|---|-------------|-------------|------------|
| K | 0.72141893  | -0.96092699 | 0.00000000 |
| K | 5.53262094  | 0.46500499  | 0.00000000 |
| K | -3.39372605 | 2.08536503  | 0.00000000 |
| K | -3.04702707 | -1.53395097 | 0.00000000 |
| H | 7.81560894  | 1.31768698  | 0.00000000 |
| H | 3.16145294  | -0.34562300 | 0.00000000 |
| H | -1.40244006 | 0.68420602  | 0.00000000 |
| H | -5.02258906 | 0.25353303  | 0.00000000 |
| H | -1.00448108 | -2.96415199 | 0.00000000 |

**11** ( $C_{2v}, {}^1A_1$ )

|   |             |             |            |
|---|-------------|-------------|------------|
| K | 0.72141893  | -0.96092699 | 0.00000000 |
| K | 5.53262094  | 0.46500499  | 0.00000000 |
| K | -3.39372605 | 2.08536503  | 0.00000000 |
| K | -3.04702707 | -1.53395097 | 0.00000000 |
| H | 7.81560894  | 1.31768698  | 0.00000000 |
| H | 3.16145294  | -0.34562300 | 0.00000000 |
| H | -1.40244006 | 0.68420602  | 0.00000000 |
| H | -5.02258906 | 0.25353303  | 0.00000000 |
| H | -1.00448108 | -2.96415199 | 0.00000000 |

**12** ( $C_1, {}^1A$ )

|   |             |             |             |
|---|-------------|-------------|-------------|
| K | 0.37041100  | 2.31206200  | 0.62732000  |
| K | 3.61790400  | -0.27465700 | -0.13373100 |
| K | -1.67687600 | -1.35900200 | 1.06275800  |
| K | -4.59515100 | 0.30901900  | -1.36099700 |



|   |             |             |             |
|---|-------------|-------------|-------------|
| H | 5.00007667  | -2.05174946 | -0.73409848 |
| H | 1.07644800  | -0.42932100 | 1.74753800  |
| H | 2.81341200  | 2.60972500  | -0.97592000 |
| H | -2.57319800 | 1.63366300  | 0.30857400  |
| H | -4.11747000 | -2.41190000 | -0.41104400 |

**13** ( $C_s, {}^1A'$ )

|   |             |             |             |
|---|-------------|-------------|-------------|
| K | -6.23666199 | -0.21296631 | 0.00000000  |
| K | 3.46465901  | -0.17285152 | -1.76786883 |
| K | -0.56256387 | 0.58298171  | 0.00000000  |
| K | 3.46465901  | -0.17285152 | 1.76786883  |
| H | -8.43767435 | -0.97745476 | 0.00000000  |
| H | -3.48504137 | 0.82219286  | 0.00000000  |
| H | 2.15807613  | 2.04941672  | 0.00000000  |
| H | 1.44218627  | -1.75400913 | 0.00000000  |
| H | 5.85070230  | -0.60208034 | 0.00000000  |

**14** ( $C_{2v}, {}^1A_1$ )

|   |             |             |             |
|---|-------------|-------------|-------------|
| K | 0.00000000  | -0.00000000 | 6.48792820  |
| K | 0.00000000  | -0.00000000 | -2.08634080 |
| K | 0.00000000  | -0.00000000 | -7.07106280 |
| K | 0.00000000  | -0.00000000 | 2.87643920  |
| H | 0.00000000  | -0.00000000 | -9.48799180 |
| H | 0.00000000  | -0.00000000 | -4.55052880 |
| H | 0.00000000  | -0.00000000 | 0.35762420  |
| H | 0.00000000  | -1.82791412 | 4.87429216  |
| H | -0.00000000 | 1.82791412  | 4.87429216  |

**15** ( $D_{\infty h}, {}^1\Sigma_{gg}$ )

|   |             |            |             |
|---|-------------|------------|-------------|
| K | 0.00000000  | 0.00000000 | -2.46486600 |
| K | 0.00000000  | 0.00000000 | 2.46486600  |
| K | 0.00000000  | 0.00000000 | -7.42813600 |
| K | 0.00000000  | 0.00000000 | 7.42813600  |
| H | 0.00000000  | 0.00000000 | 4.90177300  |
| H | 0.00000000  | 0.00000000 | 0.00000000  |
| H | -0.00000000 | 0.00000000 | -4.90177300 |
| H | 0.00000000  | 0.00000000 | -9.83483600 |
| H | 0.00000000  | 0.00000000 | 9.83483600  |

**16** ( $C_2, {}^1A$ )

|   |             |             |             |
|---|-------------|-------------|-------------|
| K | 0.00000000  | -0.00000000 | -1.50680608 |
| K | 0.00679936  | -3.55345095 | -0.59008950 |
| K | -0.00679936 | 3.55345095  | -0.59008950 |
| K | 0.00000000  | -0.00000000 | 2.61910792  |

|   |             |             |             |
|---|-------------|-------------|-------------|
| H | 0.00000000  | -0.00000000 | 5.10214892  |
| H | 0.84308970  | -1.64499862 | 0.66658614  |
| H | -0.84308970 | 1.64499862  | 0.66658614  |
| H | -0.77341525 | -2.38674406 | -2.57282764 |
| H | 0.77341525  | 2.38674406  | -2.57282764 |

**17** ( $D_{2v}$ ,  $^1A_1$ )

|   |             |             |             |
|---|-------------|-------------|-------------|
| K | 0.00000000  | 0.00000000  | 2.49884000  |
| K | 0.00000000  | 0.00000000  | 6.12764100  |
| K | 0.00000000  | 0.00000000  | -2.49884000 |
| K | 0.00000000  | 0.00000000  | -6.12764100 |
| H | 0.10000000  | 1.84847900  | 4.54779300  |
| H | -0.10000000 | -1.84847900 | 4.54779300  |
| H | 0.00000000  | 0.00000000  | 0.00000000  |
| H | 1.84847900  | 0.10000000  | -4.54779300 |
| H | -1.84847900 | -0.10000000 | -4.54779300 |

**18** ( $C_{2v}$ ,  $^1A_1$ )

|   |             |             |             |
|---|-------------|-------------|-------------|
| K | 0.00000000  | 0.00000000  | -3.83537314 |
| K | -1.60409600 | 0.00000000  | -0.25089024 |
| K | 1.60409600  | 0.00000000  | -0.25089024 |
| K | 0.00000000  | 0.00000000  | 4.37691507  |
| H | 0.00000000  | 0.00000000  | 6.77784113  |
| H | 0.00000000  | 0.00000000  | 1.82811674  |
| H | 0.00000000  | -1.59048997 | -1.54250590 |
| H | -0.00000000 | 1.59048997  | -1.54250590 |
| H | 0.00000000  | 0.00000000  | -6.27641349 |

**19** ( $C_{2v}$ ,  $^1A_1$ )

|   |             |             |             |
|---|-------------|-------------|-------------|
| K | 0.00000000  | 4.55984875  | -1.50875831 |
| K | 0.00000000  | -4.55984875 | -1.50875831 |
| K | 1.74705302  | -0.00000000 | 1.54366804  |
| K | -1.74705302 | -0.00000000 | 1.54366804  |
| H | 0.00000000  | 6.47702108  | -2.83132333 |
| H | 0.00000000  | 2.12387112  | 0.16548189  |
| H | 0.00000000  | 0.00000000  | 4.00511312  |
| H | 0.00000000  | -2.12387112 | 0.16548189  |
| H | 0.00000000  | -6.47702108 | -2.83132333 |

**20** ( $C_{2v}$ ,  $^1A_1$ )

|   |             |             |             |
|---|-------------|-------------|-------------|
| K | 0.00000000  | -4.37679391 | -0.12409055 |
| K | 0.00000000  | -0.00000000 | -1.77514875 |
| K | 0.00000000  | -0.00000000 | 1.97062225  |
| K | -0.00000000 | 4.37679391  | -0.12409055 |

|   |             |             |             |
|---|-------------|-------------|-------------|
| H | 0.00000000  | -6.29763135 | -1.54127534 |
| H | 0.00000000  | -1.82554239 | -0.14755355 |
| H | 0.00000000  | -0.00000000 | 4.37910225  |
| H | -0.00000000 | 1.82554239  | -0.14755355 |
| H | -0.00000000 | 6.29763135  | -1.54127534 |
